# Supplementary material for: Keratin 8 absence down-regulates colonocyte HMGCS2 and modulates colonic ketogenesis and energy metabolism
Source: PubMed Central journal article supplement — Mol Biol Cell. 2015 Jun 15;26(12):2298–310. doi: 10.1091/mbc.E14-02-0736 (PMC4462946; doi:10.1091/mbc.e14-02-0736), 2015-06-15
Supplement: supp_E14-02-0736v1_CombinedSupMats.pdf [file supp_E14-02-0736v1_CombinedSupMats.pdf]

# Supplemental Materials

*Molecular Biology of the Cell*

Helenius et al.

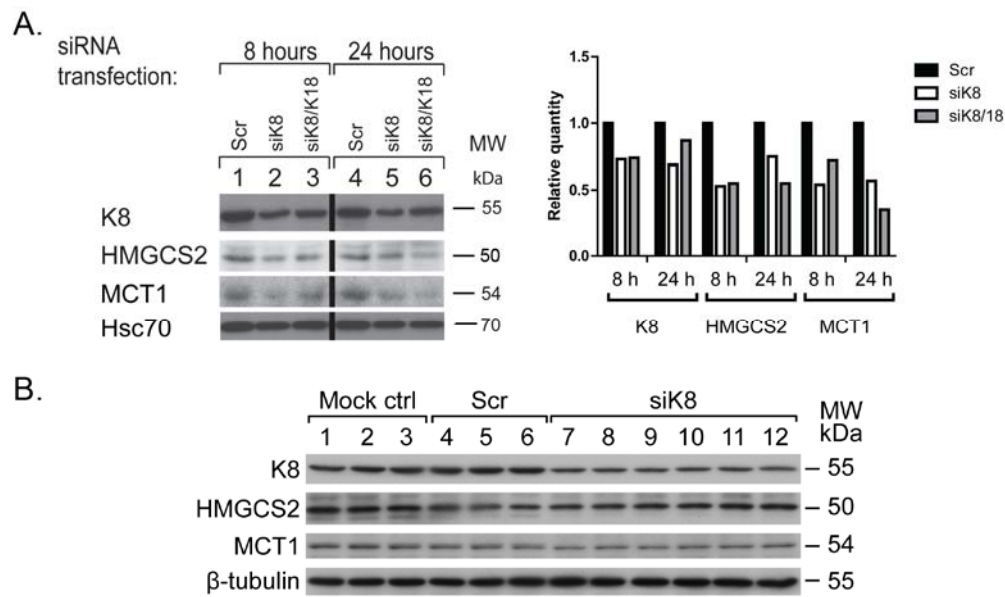

**Supplemental figure 1. Silencing of K8 and K18 downregulates MCT1 and HMGCS2 expression in HT-29 and Caco-2 cells.** (A) HT-29 cells were transfected for 8 and 24 hours with: scrambled siRNA control (Scr), siRNA keratin 8 (siK8, Abnova) or a combination of siRNA for K8 and siRNA K18 (siK8 + siK18). HT-29 cell lysates were analyzed by immunoblotting for K8, HMGCS2 and MCT1. Equal loading is shown by Hsc70. (B) Caco-2 cells were mock-transfected (all reagents except siRNA), transfected with scrambled siRNA control (Scr) or siRNA K8 (siK8, Eurofins Genomics). Caco-2 cell lysates were analyzed by immunoblotting for K8, HMGCS2 and MCT1. Equal loading is shown by  $\beta$ -tubulin.

A.

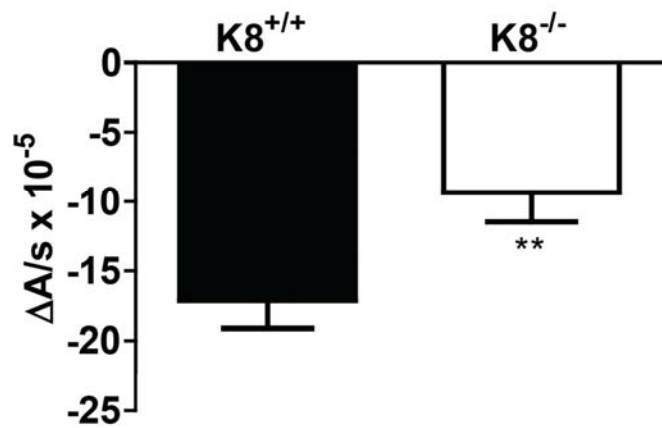

B.

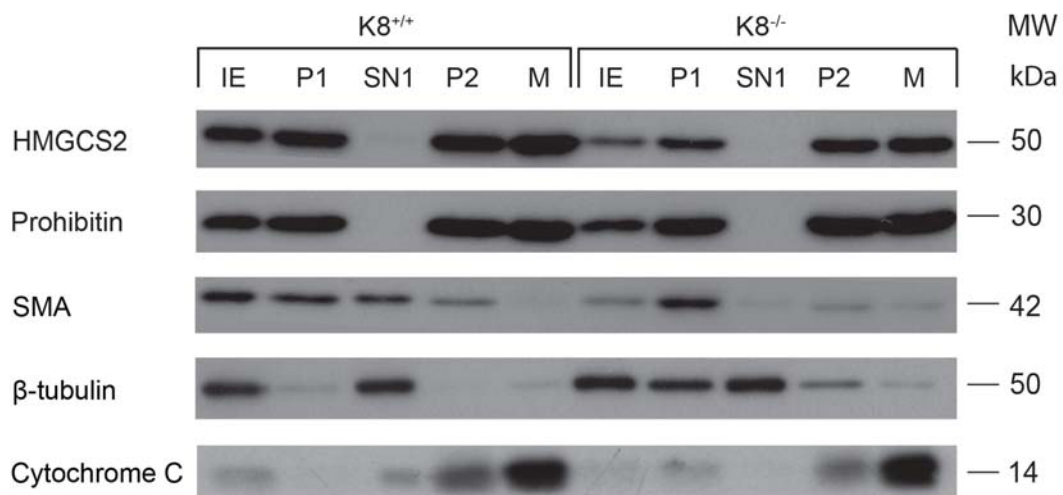

**Supplemental figure 2. Absence of K8 leads to diminished HMGCS2 enzyme activity in K8<sup>-/-</sup> mice.** HMGCS2 activity was determined in K8<sup>+/+</sup> and K8<sup>-/-</sup> mice by measuring the loss of absorbance that occurs at 303 nm as HMGCS2 converts acetoacetyl-CoA and acetyl-CoA to HMG-CoA and CoA. The enzyme activity was calculated for K8<sup>+/+</sup> and K8<sup>-/-</sup> and expressed as change in absorbance per second ( $\Delta A/s$ ). The results are based on three independent experiments (each experiment involving one K8<sup>+/+</sup> and one K8<sup>-/-</sup> mouse) and represent the mean  $\pm$  SD (\*\* =  $p < 0.01$ ) (A). Lysates of isolated colonic epithelium and different fractions collected during the isolation of mitochondria were normalized by protein assay and analyzed by immunoblotting for HMGCS2, prohibitin, SMA,  $\beta$ -tubulin and cytochrome c. Although K8<sup>+/+</sup> and K8<sup>-/-</sup> epithelia are characterized by different morphologies due to long crypts in K8<sup>-/-</sup>, very comparable fractions were obtained from both genotypes (compare prohibitin and cytochrome c protein levels between K8<sup>+/+</sup> and K8<sup>-/-</sup>). The down-regulation of HMGCS2 in K8<sup>-/-</sup> is clearly seen in isolated epithelium and in isolated mitochondria in comparison to K8<sup>+/+</sup>. This decrease is not due to fewer mitochondria because the levels of the mitochondrial markers prohibitin and cytochrome c are unchanged in K8<sup>-/-</sup> in

comparison to K8<sup>+/+</sup>. The purity of isolated mitochondria was assessed by detection of muscle (SMA) and cytoplasm ( $\beta$ -tubulin) and was found negligible. IE = isolated epithelium, P1 and P2 = pellet 1 and 2, SN1 = supernatant 1 and M = isolated mitochondria (B).

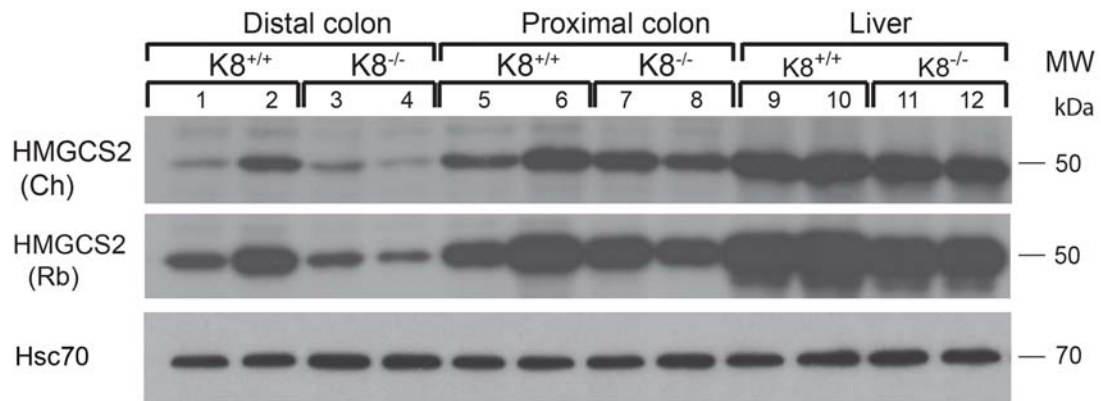

**Supplemental figure 3. HMGCS2 is expressed at different levels in an organ-specific manner.** Total lysates of distal and proximal colon and liver were obtained from K8<sup>+/+</sup> and K8<sup>-/-</sup> mice. Lysates were normalized by protein assay and analyzed by immunoblotting. Equal loading is shown by Hsc70. The levels of HMGCS2 were compared using two different HMGCS2 antibodies from two different hosts, chicken (Ch) and rabbit (Rb). The highest expression levels of HMGCS2 are observed in liver, the main ketogenic organ. Lower levels of HMGCS2 are expressed in the colon, with higher levels in the proximal than distal colon. However, HMGCS2 is down-regulated in K8<sup>-/-</sup> distal and proximal colon, whereas no down-regulation is seen in K8<sup>-/-</sup> liver.

A.

| Genotype/diet                          | Food ingested (g) |            |               |
|----------------------------------------|-------------------|------------|---------------|
|                                        | Female            | Male       | Female + Male |
| <b>K8<sup>+/+</sup> Control diet</b>   | 48.0 ± 0.9        | 50.9 ± 3.7 | 49.4 ± 2.9    |
| <b>K8<sup>-/-</sup> Control diet</b>   | 48.6 ± 2.4        | 51.2 ± 7.4 | 49.6 ± 4.3    |
| <b>K8<sup>+/+</sup> Ketogenic diet</b> | 42.9 ± 9.2        | 41.3 ± 3.1 | 42.3 ± 6.7    |
| <b>K8<sup>-/-</sup> Ketogenic diet</b> | 40.3 ± 2.5        | 41.2 ± 2.9 | 40.7 ± 2.5    |

B.

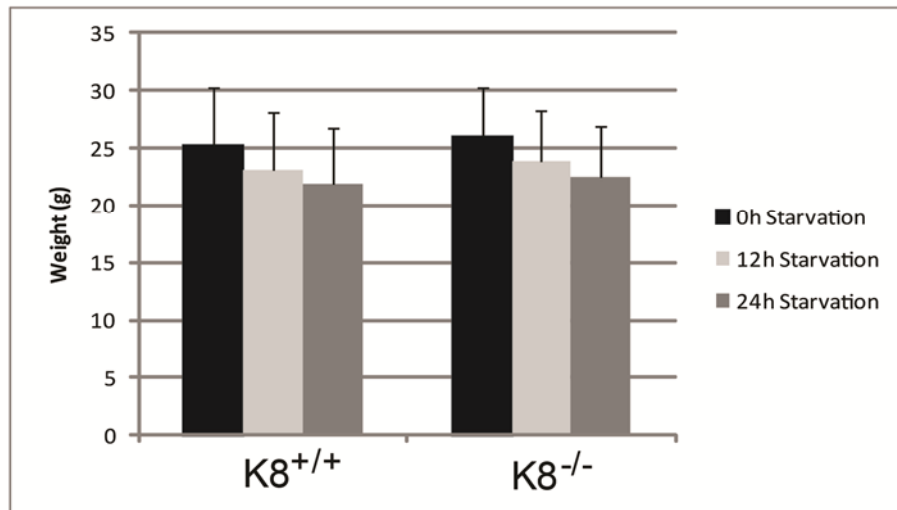

C.

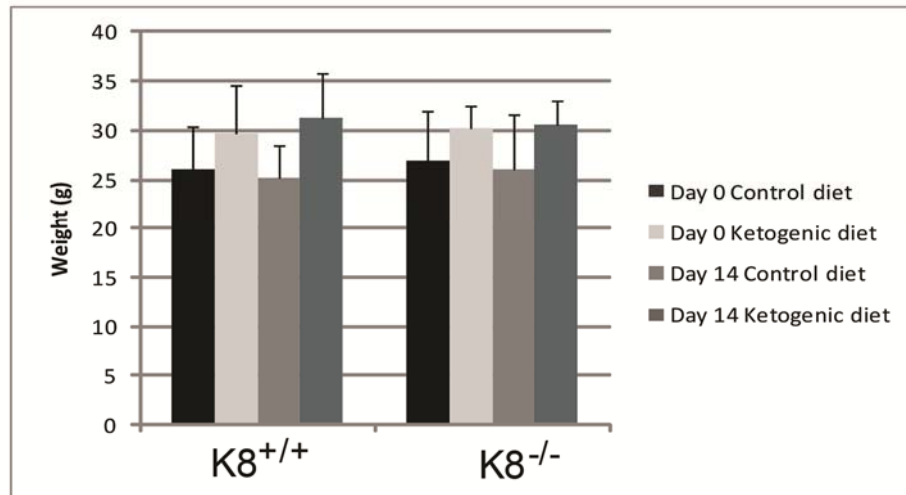

**Supplemental figure 4. Food ingestion and mouse body weight changes under ketogenic conditions are similar in K8<sup>+/+</sup> and K8<sup>-/-</sup>.** The amount of food ingested (A) by the different genotypes and gender groups during the control and ketogenic diet periods were calculated based on the daily food intake. The body weights of K8<sup>+/+</sup> and

K8<sup>-/-</sup> mice were measured after 0, 12 and 24 hours of starvation (B) and 0 and 14 days after onset of a ketogenic diet (C).

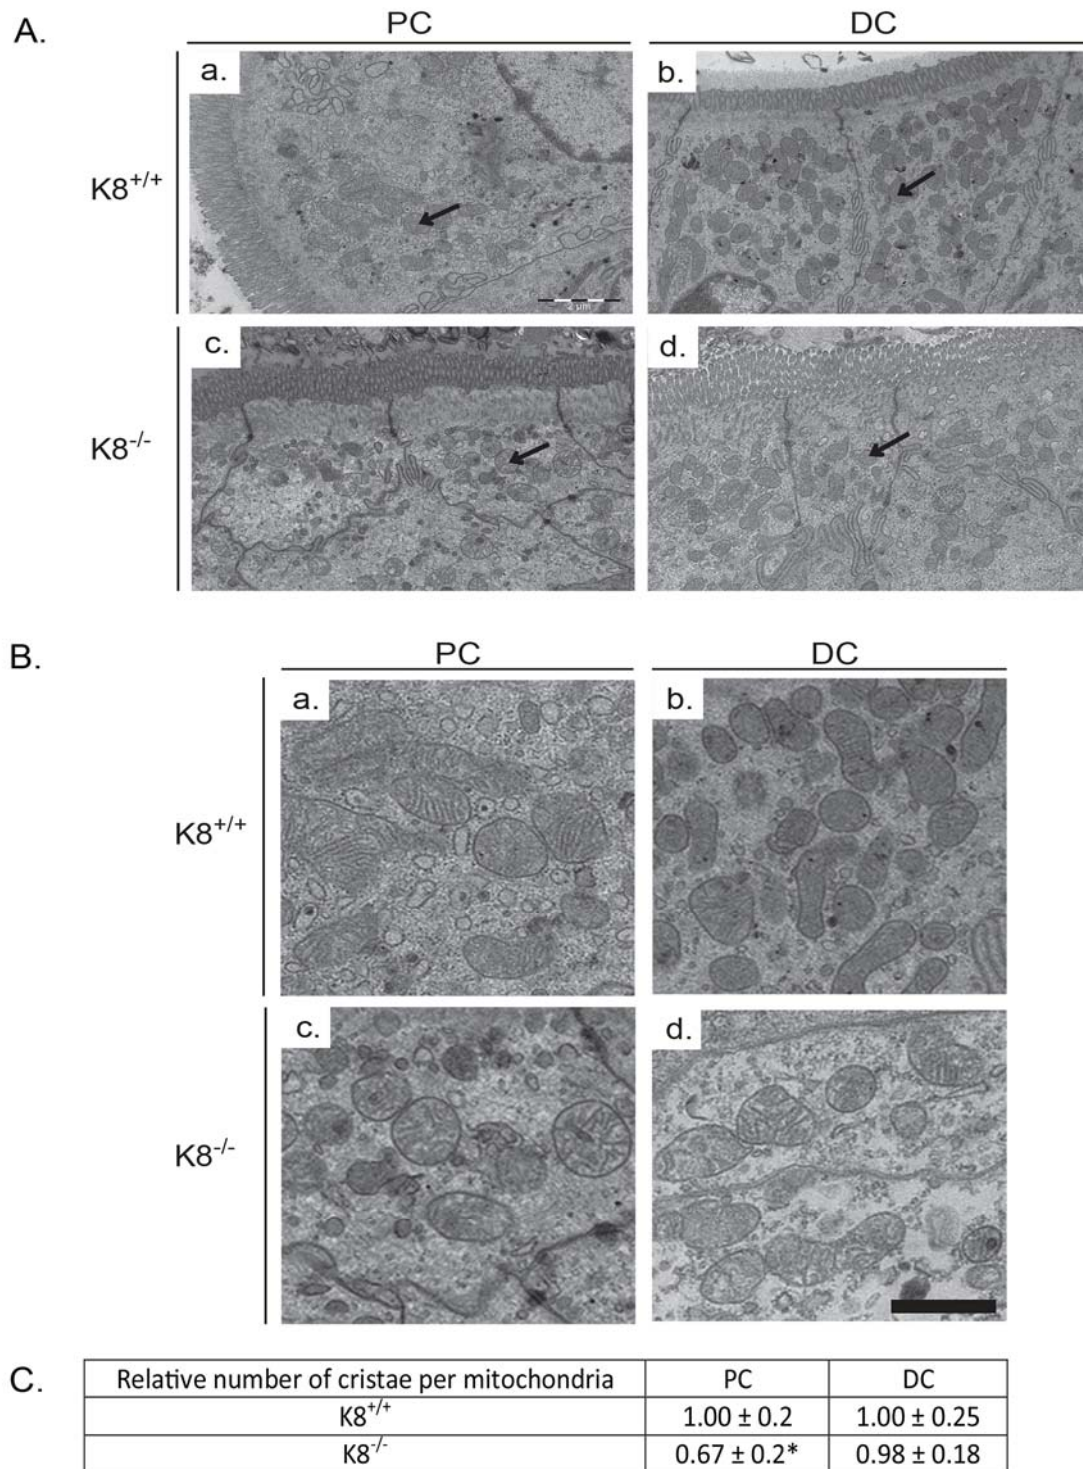

**Supplemental figure 5. K8<sup>-/-</sup> colonocyte mitochondria are normal size and location but have fewer cristae.** Colonocyte mitochondria were analyzed in K8<sup>+/+</sup> and K8<sup>-/-</sup> PC and DC by transmission electron microscopy (A, B, C). No differences were seen in mitochondrial size or localization, whereas there was a significantly lower number of

cristae per mitochondria section area in  $K8^{-/-}$  PC (C) compared to  $K8^{+/+}$ . n = 3 mice, 6 mitochondria/genotype, average  $\pm$  SD, \* =  $p < 0.05$  compared to  $K8^{+/+}$  PC.

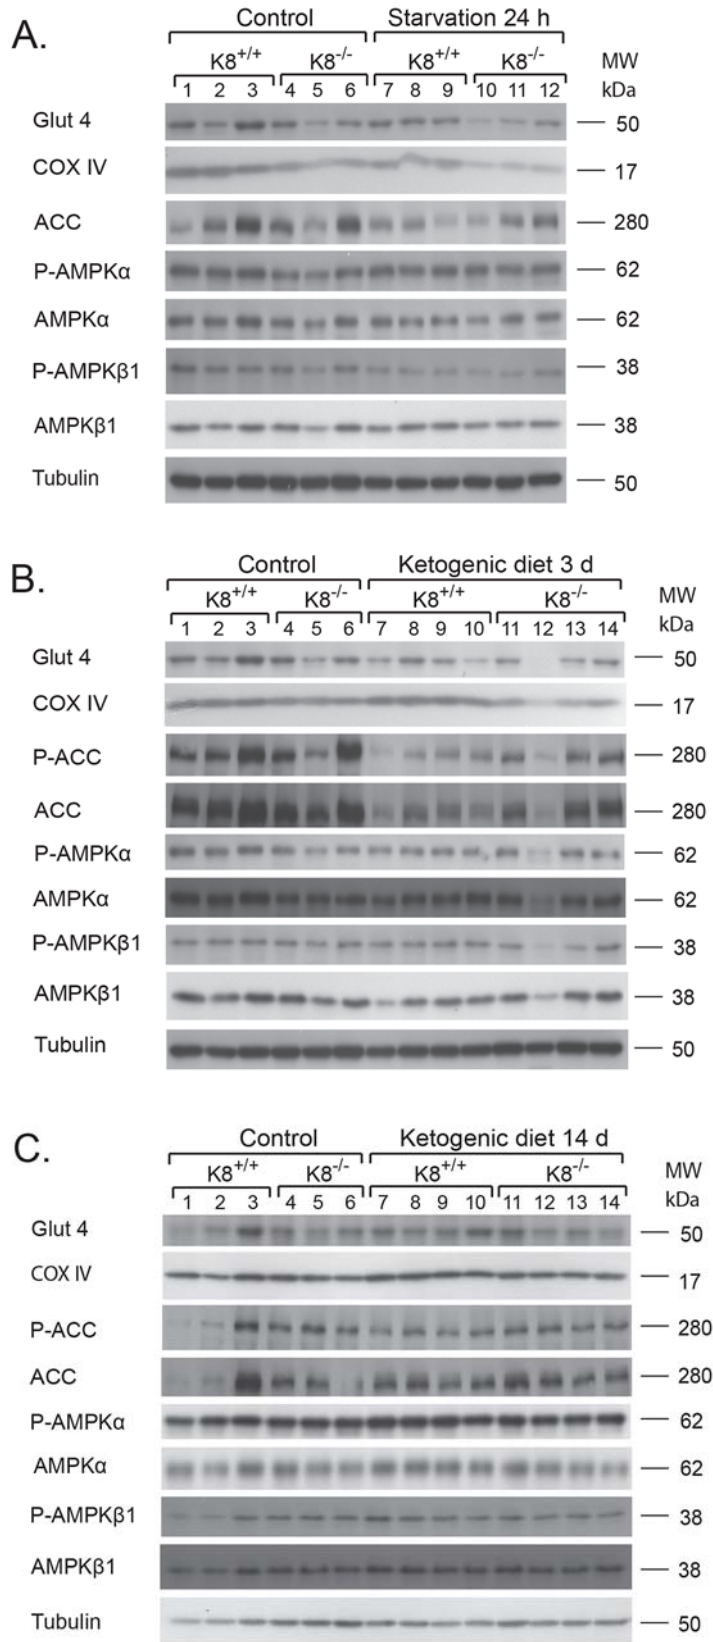

**Supplemental figure 6. Minor differences in energy homeostasis between  $K8^{-/-}$  mice subjected to normal and ketogenic conditions.** Total lysates of equal parts of distal and

proximal colons from K8<sup>+/+</sup> and K8<sup>-/-</sup> mice subjected to normal and different ketogenic conditions (A: 24 h of starvation, B: 3 days of ketogenic diet, C: 14 days of ketogenic diet) were analyzed for a panel of proteins related to cellular energy metabolism.

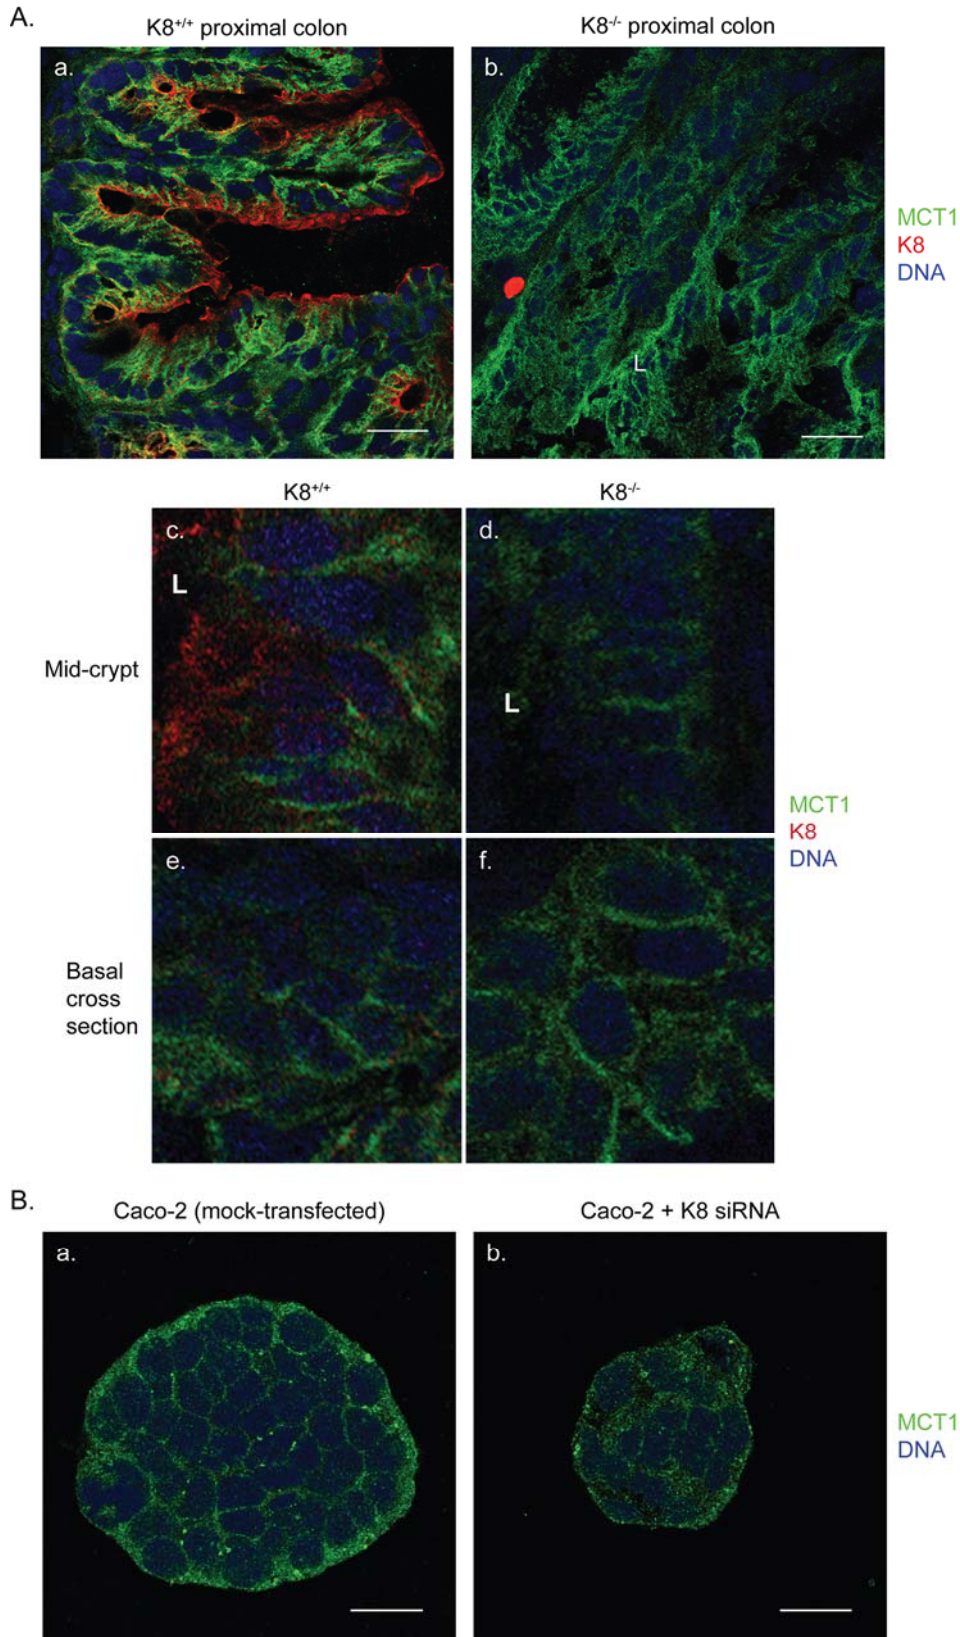

**Supplemental figure 7. MCT1 localization remains unchanged while the levels of MCT1 are decreased in K8<sup>-/-</sup> proximal colon and in K8 siRNA-treated Caco-2 cells.**

**A.** K8<sup>+/+</sup> (a, c, e) and K8<sup>-/-</sup> (b, d, f) proximal colon were cryosectioned and analyzed by immunostaining for MCT1 (green), K8 (red) and DNA (blue). The blown-up images in c-f show representative areas of mid-crypt lateral plasma membrane MCT1 staining, and MCT staining in the plasma membrane near the basal part of crypt cells from K8<sup>+/+</sup> and K8<sup>-/-</sup> distal colon, showing similar MCT1 distribution independent of the presence of K8.

**B.** Caco-2 cells were mock-transfected (a) or K8 siRNA-treated (b) for 72 hours and analyzed by immunostaining for MCT1 (green), and nuclei (blue). K8 siRNA treatment decreases K8-levels with 50-70% (see Supplemental Figure 1B. Scale bars: 25  $\mu$ m, L = lumen.

**Supplemental Table 1. List of differentially expressed proteins in K8<sup>-/-</sup> colonocytes**

| Spot number | Accession number | Down-regulated protein ID in K8 <sup>-/-</sup> | Ratio of change | Role/location                                                                                                         |
|-------------|------------------|------------------------------------------------|-----------------|-----------------------------------------------------------------------------------------------------------------------|
| 365         | Q811J3           | Iron-responsive element-binding protein 2      | -1.8            | regulation of iron metabolism /cytoplasm                                                                              |
| 368         |                  | Iron-responsive element-binding protein 2      | -1.7            |                                                                                                                       |
| 623         | P53690           | Matrix metalloproteinase 14                    | -1.2            | breakdown of extracellular matrix/cytoplasm, membrane                                                                 |
| 906         | P17563           | Selenium binding protein                       | -4.5            | selenium binding/cytoplasm, membrane, nucleus                                                                         |
| 916         | P26443           | Glutamate dehydrogenase                        | -1.7            | ATP-GTP-binding, NAD <sup>+</sup> and NAD(P) <sup>+</sup> activity/mitochondrial inner membrane, mitochondrial matrix |
| 1032        | P54869           | HMGCS2                                         | -3.3            | ketone bodies production/mitochondrion                                                                                |
| 1033        |                  | HMGCS2                                         | -3.4            |                                                                                                                       |
| 1035        |                  | HMGCS2                                         | -4.7            |                                                                                                                       |
| 1044        |                  | HMGCS2                                         | -4.2            |                                                                                                                       |
| 1637        | P34896           | Serine hydroxymethyl-transferase               | -2.1            | conversion of serine and glycine/cytoplasm                                                                            |
| 1840        |                  | Phosphoglycerate dehydrogenase 1               | -3.9            | lyase/cell membrane, cytoplasm, membrane                                                                              |
| 1872        | P13634           | Carbonic                                       | -1.8            | one-carbon metabolic                                                                                                  |

|      |        |                                        |      |                                               |
|------|--------|----------------------------------------|------|-----------------------------------------------|
| 1889 |        | anhydrase I<br>Carbonic<br>anhydrase I | -8.1 | processes/cytoplasm                           |
| 1933 | Q8BU95 | Enoylcoenzyme A<br>hydratase 1         | -2.6 | fatty acids<br>metabolism/mitochondrion       |
| 1970 | P11352 | Glutathione<br>peroxidase              | -2.7 | protection from oxidative<br>damage/cytoplasm |
| 2058 | P08228 | Superoxide dismutase                   | -1.7 | protection from oxidative<br>damage/cytoplasm |

| Spot<br>number | Accession<br>number | Up-regulated protein<br>ID in K8 <sup>-/-</sup> | Ratio of<br>change | Role/location                                                                                             |
|----------------|---------------------|-------------------------------------------------|--------------------|-----------------------------------------------------------------------------------------------------------|
| 60             | Q61316              | Heat shock 70-related<br>protein APG-2          | 1.2                | chaperone-mediated protein complex<br>assembly/cytoplasm                                                  |
| 132            | BC010445.1          | GRP94/ERP99                                     | 1.3                | processing and transport of secreted<br>proteins /endoplasmatic reticulum                                 |
| 204            | Q01853              | Valosin containing<br>protein                   | 1.2                | transport and fusion of<br>vesicles/cytoplasm<br>endoplasmic reticulum,<br>nucleus                        |
| 276            | Q9DBT9              | Dimethylglycine<br>dehydrogenase                | 2.1                | amino acids metabolism/<br>mitochondrion                                                                  |
| 277            | Q5EBH4              | Dimethylglycine<br>dehydrogenase                | 1.5                | amino acids metabolism/<br>mitochondrion                                                                  |
| 438            | Q9JKX3              | Transferrin receptor<br>protein 2               | 1.9                | regulation of iron levels in blood/ cell<br>membrane, cytoplasm, membrane                                 |
| 439            |                     | Transferrin receptor<br>protein 2               | 2.7                |                                                                                                           |
| 444            |                     | Transferrin receptor<br>protein 2               | 4.0                |                                                                                                           |
| 460            | Q8BZA7              | GRP78                                           | 1.4                | Endoplasmatic reticulum integrity and<br>stress induced autophagy/cell<br>membrane, membrane              |
| 482            | P38647              | GRP75                                           | 1.2                | transport of mitochondrial proteins<br>from the cytoplasm to<br>mitochondria/mitochondrion,<br>nucleolous |
| 486            |                     | GRP75                                           | 1.2                |                                                                                                           |
| 522            | NP_112442           | Hsc71                                           | 1.5                | chaperone                                                                                                 |
| 526            |                     | Hsc71                                           | 1.1                |                                                                                                           |
| 543            |                     | Hsc71                                           | 1.3                |                                                                                                           |
| 749            | P63038              | Hsp60                                           | 1.5                | chaperone/mitochondrion matrix                                                                            |

|      |        |                                                 |     |                                                |
|------|--------|-------------------------------------------------|-----|------------------------------------------------|
| 752  |        | Hsp60                                           | 1.5 |                                                |
| 755  |        | Hsp60                                           | 0.1 |                                                |
| 952  | P47738 | Mitochondrial ALDH                              | 1.2 | oxidationof aldehydes/<br>mitochondrion        |
| 1093 | P16460 | Argininosuccinate<br>synthase 1                 | 2.0 | arginine biosynthetic<br>pathway/mitochondrion |
| 1096 |        | Argininosuccinate<br>synthase 1                 | 2.0 |                                                |
| 1424 | Q64467 | Glyceraldehyde 3-<br>phosphate<br>dehydrogenase | 1.6 | glycolysis/cytoplasm                           |
| 1425 | P16858 | Glyceraldehyde 3-<br>phosphate<br>dehydrogenase | 1.3 | glycolysis/cytoplasm, cytoskeleton,<br>nucleus |

**Supplemental table 1. Complete list of differentially expressed proteins in K8<sup>-/-</sup> colonocytes.** In the K8<sup>-/-</sup> colonocytes, major down-regulated proteins were as expected K8 and K19 and their fragments. When compared to K8<sup>+/+</sup>, the novel most down-regulated protein in K8<sup>-/-</sup> was the rate-limiting enzyme of ketogenesis, HMGCS2, and its 4 isoforms (spots 1032, 1033, 1035 and 1044).
